**FtsEX-mediated regulation of inner membrane fusion and cell separation reveals morphogenetic plasticity in *Caulobacter crescentus***

**Short title:**

**Cell division mutant reveals plasticity in bacterial morphogenetic programs**

**Elizabeth L. Meier<sup>1</sup>, Qing Yao<sup>2</sup>, Allison K. Daitch<sup>1</sup>, Grant J. Jensen<sup>2,3</sup> and Erin D. Goley<sup>1#</sup>**

**<sup>1</sup>Department of Biological Chemistry, Johns Hopkins University School of Medicine, Baltimore, Maryland 21205, USA**

**<sup>2</sup>Division of Biology and Biological Engineering and <sup>3</sup>Howard Hughes Medical Institute, California Institute of Technology, Pasadena, California 91125, USA**

**<sup>#</sup>Correspondence and requests for materials should be addressed to E.D.G. (email: [egoley1@jhmi.edu](mailto:egoley1@jhmi.edu)).**

## Abstract

During its life cycle, *Caulobacter crescentus* undergoes a series of coordinated shape changes, including generation of a polar stalk and reshaping of the cell envelope to produce new daughter cells through the process of cytokinesis. The mechanisms by which these morphogenetic processes are coordinated in time and space remain largely unknown. Here we demonstrate that the conserved division complex FtsEX controls both the early and late stages of cytokinesis in *C. crescentus*, namely initiation of constriction and final cell separation.  $\Delta ftsE$  cells display a striking phenotype: cells are chained, with skinny connections between cell bodies resulting from defects in inner membrane fusion and cell separation. Surprisingly, the thin connections in  $\Delta ftsE$  cells share morphological and molecular features with *C. crescentus* stalks. Our data uncover unanticipated morphogenetic plasticity in *C. crescentus*, with loss of FtsE causing a stalk-like program to take over at failed division sites and yield novel cell morphology.

## Author Summary

Bacterial cell shape is genetically hardwired and is critical for fitness and, in certain cases, pathogenesis. In most bacteria, a semi-rigid structure called the cell wall surrounds the inner membrane, offering protection against cell lysis while simultaneously maintaining cell shape. A highly dynamic macromolecular structure, the cell wall undergoes extensive remodeling as bacterial cells grow and divide. We demonstrate that a broadly conserved cell division complex, FtsEX, relays signals from the cytoplasm to the cell wall to regulate key developmental shape changes in the  $\alpha$ -proteobacterium *Caulobacter crescentus*. Consistent with studies in diverse bacteria, we observe strong synthetic interactions between *ftsE* and cell wall hydrolytic factors, suggesting that regulation of cell wall remodeling is a conserved function of FtsEX. Loss of FtsE causes morphological defects associated with both the early and late stages of division. Intriguingly, without FtsE, cells frequently fail to separate and instead elaborate a thin, tubular structure between cell bodies, a growth mode observed in other  $\alpha$ -proteobacteria. Overall, our results highlight the plasticity of bacterial cell shape and demonstrate how altering the activity of one morphogenetic program can produce diverse morphologies resembling those of other bacteria in nature.

## Introduction

Bacteria are capable of adopting an impressive array of shapes exquisitely tuned for their particular environmental niches. Underpinning these shapes is the bacterial cell wall, which plays an essential role in specifying and maintaining diverse morphologies [1]. The cell wall consists of a layer of peptidoglycan (PG) composed of glycan strands of repeating disaccharide subunits crosslinked by pentapeptide bridges. In addition to adapting to changing environments, the PG also undergoes dynamic remodeling to drive shape changes during dedicated cellular processes such as division [2,3].

The  $\alpha$ -proteobacterium *Caulobacter crescentus* is an ideal model organism for the study of cell shape as it undergoes a series of coordinated morphogenetic changes during its cell cycle. After every division event, *C. crescentus* produces two distinct daughter cell types. One is a flagellated, motile swarmer cell, which contains a flagellum and pili at one cell pole [4]. The other is a sessile stalked cell, where the polar flagellum has been replaced by a thin, tubular extension of the cell envelope known as a stalk [4]. Unable to replicate its chromosome or initiate cell division, a swarmer cell differentiates into a stalked cell by ejecting its flagellum, disassembling its pili, and growing a stalk at the same pole [4]. A stalked cell then elongates its cell body, replicates and segregates its DNA, and produces a flagellum at the pole opposite its stalk prior to cytokinesis. The asymmetric polarization of distinct organelles imparts *C. crescentus* with a highly tractable dimorphic life cycle ideally suited for studying developmental shape changes.

92 One cell cycle event that requires obvious reshaping of the cell envelope is cell division,  
 93 which, in nearly all bacteria, requires the conserved tubulin homolog FtsZ. A GTPase,  
 94 FtsZ polymerizes into a patchy annular structure (the Z-ring) at the incipient division site  
 95 and recruits the downstream division machinery or divisome. Together, FtsZ and  
 96 proteins of the divisome coordinate invagination and fission of the membrane(s) with  
 97 extensive cell wall remodeling [5]. A number of division proteins are known to interact  
 98 directly with FtsZ. For many of these regulators, however, their mechanism of action  
 99 toward FtsZ and physiological role in division remain to be discovered. One division  
 100 complex that has been particularly enigmatic is the ATP-binding cassette (ABC)  
 101 transporter family complex FtsEX, which is widely conserved in bacteria and functions  
 102 as a heterodimer with FtsE in the cytoplasm and FtsX in the inner membrane. In  
 103 *Escherichia coli*, FtsEX localizes to the septum and contributes to the efficiency of cell  
 104 division, particularly in salt-free media [6]. There is no evidence that FtsEX acts as a  
 105 transporter, however, and recent studies from a wide range of bacteria have instead  
 106 implicated FtsEX in the activation of cell wall hydrolysis [7-11]. Septal PG material  
 107 needs to be split to allow for outer membrane constriction and ultimately for separation of  
 108 the two new daughter cells. In high salt media, *E. coli*  $\Delta ftsEX$  cells exhibit a phenotype  
 109 similar to cell wall hydrolysis mutants, i.e. cells are chained and mildly filamentous,  
 110 suggesting a common genetic pathway [9].

111

112 In addition to its involvement in cell wall hydrolysis, in *E. coli*, FtsEX is important for  
 113 the recruitment of late division proteins and the assembly and/or stability of the septal  
 114 ring [6]. Interestingly, *E. coli* *ftsE* mutants impaired for ATP binding and hydrolysis

support Z-ring assembly, but constrict poorly [12]. Since FtsE interacts with FtsZ in *E. coli*, one possibility is that FtsEX functions as a membrane anchor for FtsZ and utilizes ATP binding and hydrolysis to regulate Z-ring constriction [13,6].

In this study, we were originally motivated to characterize FtsEX as a novel membrane anchor for FtsZ in *C. crescentus* since FtsE is one of the first proteins recruited to the nascent division site and is important for efficient cell separation and Z-ring assembly and/or stability [14,15]. Considering the conserved function of FtsEX as a modulator of cell wall remodeling, we asked whether FtsEX, in addition to promoting Z-ring structure, regulates cell wall cleavage in *C. crescentus*. We find that *ftsE* has strong synthetic cell separation defects with cell wall hydrolytic factors. Interestingly, however, deleting *ftsE* produces chains of cell bodies connected by thin, tube-like connections that contain all layers of the cell envelope. This is in stark contrast to the thick, uncleaved septa and compartmentalized cytoplasms observed in hydrolysis mutants from *E. coli* and other organisms. The cell-cell connections of  $\Delta$ *ftsE* cells are, instead, morphologically and topologically similar to *C. crescentus* stalks. In accordance with their shared morphological features, the stalk proteins StpX and PbpC localize to both the skinny connections and stalks of  $\Delta$ *ftsE* cells, indicating that stalk formation may be mechanistically similar to the elaboration of the extended constriction sites. Our data reveal unanticipated morphogenetic plasticity in *C. crescentus*, with a stalk-like program taking over at failed division sites in the  $\Delta$ *ftsE* mutant to yield novel cell morphology.

## Results

### $\Delta ftsE$ cells form chains connected by skinny constrictions

To begin to address the role of FtsEX in *C. crescentus*, we first attempted to make *ftsE* and *ftsX* deletion strains. Although *ftsE* is annotated as essential [16,14], we successfully made several independent  $\Delta ftsE$  clones [15]. *ftsX* is also annotated as essential [16], but unlike *ftsE*, we were unable to make an *ftsX* deletion, depletion, or overexpression strain, suggesting that *C. crescentus* cells are highly sensitive to changes in FtsX levels. To understand the role of the FtsEX complex in *C. crescentus* morphogenesis, we focused on characterizing the *ftsE* mutant in detail.  $\Delta ftsE$  cells displayed a striking division phenotype consisting of chained cells with skinny, extended connections between cell bodies. Consistent with the chaining phenotype,  $\Delta ftsE$  cells are longer and grow more slowly than WT [15]. Transmission electron microscopy (TEM) offered us better resolution of cells lacking FtsE (Fig 1).  $\Delta ftsE$  cell bodies were heterogeneous in length, but overall appeared elongated compared to WT, which suggests a delay or inefficiency in the initiation of constriction. The thin connections between  $\Delta ftsE$  cell bodies were also heterogeneous in length, with some extending hundreds of nanometers, and had dimensions qualitatively similar to those observed for stalks (Fig 1B). Overall, the  $\Delta ftsE$  phenotype supports a role for FtsE both in the initiation of constriction and in late stage cell separation.

### FtsE promotes focused Z-ring organization

FtsE has been reported to bind FtsZ in *E. coli*, is one of the first division proteins to localize to midcell after FtsZ in *C. crescentus*, and *C. crescentus*  $\Delta ftsE$  cells have aberrant

Z-rings [13-15]. Specifically, in  $\Delta ftsE$  cells FtsZ is more diffuse and often localizes as clusters of puncta instead of focused Z-rings (Fig 2) [15]. These data suggest that FtsE may regulate early Z-ring structure and/or assembly. Consequently, we tested if *ftsE* interacted genetically with the positive Z-ring regulator *zapA*, which, like FtsE, is also recruited early to midcell by FtsZ in *C. crescentus* [17,14].  $\Delta zapA \Delta ftsE$  cells displayed mild synthetic growth and cell length defects, but had severely disrupted, diffuse Z-ring structures (Fig 2). We also observed that  $\Delta zapA \Delta ftsE$  cells were very sensitive to even slight increases in FtsZ levels and were noticeably filamentous after only one hour of *ftsZ-cfp* expression (Fig 2D). We conclude that FtsE contributes to proper Z-ring focusing at midcell and that the elongated cell bodies in  $\Delta ftsE$  are likely due to inefficient initiation of constriction by the aberrant FtsZ structures.

### **Excess FtsE or FtsEX alters the localization of FtsZ and new cell wall synthesis**

Because cells lacking FtsE have perturbed Z-ring organization, we hypothesized that overproducing FtsE would affect Z-ring structure, particularly if FtsE binds directly to FtsZ. Overexpression of either *ftsE* or *ftsEX* caused dramatic filamentation, and overexpression of *ftsE* alone also caused ectopic poles to form (Fig 3). After four hours of FtsE overproduction, instead of Z-rings, FtsZ-CFP formed discrete puncta along the length of the filamentous cells (Fig 3A). Interestingly, when we overproduced FtsEX, FtsZ-CFP localized in a drastically different pattern, as multiple wide bands (Fig 3A). *C. crescentus* Z-ring positioning is in part dictated by a negative regulator of FtsZ assembly called MipZ, which forms a complex near the origin of replication [18]. After the polar origin region is duplicated, the second copy is quickly transported to the opposite cell



pole. Bipolar MipZ thereby directs Z-ring assembly at midcell by inhibiting FtsZ polymerization at the poles [18]. MipZ-YFP localized at the poles and as fairly regularly spaced puncta in cells overproducing FtsE or FtsEX, but its localization was more diffuse in cells overproducing FtsEX (Fig 3B). We interpret the MipZ localization data as evidence that chromosomal replication and segregation still occur in cells overproducing FtsE despite the inhibition of division; however high levels of FtsEX may interfere with levels or localization of MipZ.

In *C. crescentus*, FtsZ directs new cell wall synthesis at midcell even before the onset of division (Fig 3C) [19]. To determine if the FtsZ structures in FtsE or FtsEX overproducing cells were competent to localize new cell wall synthesis, we pulse-labeled cells with the fluorescent D-amino acid hydroxycoumarin-carbonyl-amino-D-alanine (HADA), which can replace D-Ala<sup>4</sup> or D-Ala/Gly<sup>5</sup> in the lipid II peptide side chain, to track the incorporation of newly synthesized PG [20]. High levels of FtsE resulted in diffuse HADA labeling which closely resembled the pattern of HADA incorporation in FtsZ-depleted cells (Fig 3C). This result suggests that the FtsZ puncta associated with *ftsE* overexpression are unable to direct local cell wall metabolism. Cells overexpressing *ftsEX*, however, had discrete, wide bands of new PG incorporation, likely directed by the similarly organized Z-ring structures (Fig 3C). Thus, high levels of FtsE or FtsEX not only differentially affect Z-ring organization, but also affect FtsZ's ability to locally incorporate new cell wall material at midcell. Specifically, the intact FtsEX complex is required both for formation of Z-rings and downstream communication with PG synthetic machinery.

207  
 208 ***ftsE* interacts genetically with PG hydrolytic factors and a regulator of stalked pole**  
 209 **development**

210 Since FtsEX has been implicated in cell wall hydrolysis in numerous bacteria and  $\Delta ftsE$   
 211 cells displayed a cell chaining phenotype, we asked whether FtsEX, in addition to  
 212 promoting Z-ring structure, regulates *C. crescentus* cell wall hydrolysis. In *E. coli*,  
 213 periplasmic *N*-acetylmuramyl-L-alanine amidases AmiA/B/C are responsible for cleaving  
 214 bonds that link stem peptides to glycan strands at the septum [21]. The amidases require  
 215 activation by the LytM domain containing proteins EnvC, which stimulates AmiA/B, and  
 216 NlpD, which stimulates AmiC, to split apart septal PG [22,23]. FtsEX directly recruits  
 217 EnvC to the septum via the periplasmic extracellular loop (ECL) of FtsX and the coiled  
 218 coil (CC) domain of EnvC [9]. *C. crescentus* possesses a limited number of lytic  
 219 enzymes involved in peptidoglycan remodeling, with only a single *N*-acetylmuramyl-L-  
 220 alanine amidase, most similar to *E. coli* AmiC [24,25]. There are at least seven genes  
 221 coding for putative LytM domain containing proteins; however, the only characterized  
 222 protein in the *C. crescentus* LytM family is DipM, which participates in cell wall  
 223 remodeling and coordinated constriction of the cell envelope layers at the division plane  
 224 [25-27]. To determine whether the FtsEX PG hydrolysis paradigm applies to *C.*  
 225 *crescentus*, we performed a BLAST search for *E. coli* EnvC homologues and found  
 226 CCNA\_03547, which we will hereafter refer to as *LytM domain protein F* (LdpF)  
 227 (Martin Thanbichler, personal communication). Like EnvC, LdpF is a LytM domain  
 228 containing protein with a signal peptide, two N-terminal CC domains, and a C-terminal

LytM domain (Fig S1A). We hypothesized that *C. crescentus* FtsEX-LdpF-AmiC may function in an activation pathway analogous to *E. coli* FtsEX-EnvC-AmiA/B.

We first adopted a genetic approach to investigate the role of FtsEX in cell wall hydrolysis during division. In *E. coli*, FtsEX is required for EnvC's localization at midcell [9]. However, LdpF-mCherry is diffuse, and we did not observe differences in its localization between WT and  $\Delta ftsE$  cells (Fig S1B). Although *E. coli* cells lacking EnvC or AmiA/B are not as sick as cells lacking FtsEX, part of the division defect associated with loss of FtsEX may be due to EnvC inactivation [9]. Consistent with this reasoning, in *C. crescentus*, cells lacking LdpF or AmiC had mild chaining and growth defects compared to  $\Delta ftsE$  cells (Fig 4). Depleting AmiC in  $\Delta ftsE$  or  $\Delta ldpF$  backgrounds caused strong synthetic cell separation and growth defects, accompanied by noticeable lengthening of the skinny connections between cell bodies, particularly in the *ftsE* mutant (Fig 4). Combining  $\Delta ldpF$  with loss of FtsE produced only mild synthetic growth and chaining defects, which is consistent with them acting in a common pathway (Fig 4).

*E. coli* cells lacking EnvC depend on NlpD for cell separation: simultaneous inactivation of either EnvC or FtsEX and NlpD results in severe chaining, supporting the hypothesis that FtsEX activates EnvC's ability to promote septal PG cleavage [22]. In *C. crescentus*, the LytM protein most closely related to NlpD is DipM, which has similar domain organization to NlpD but differs in that it is not associated with the outer membrane. Depleting AmiC in cells lacking DipM caused a moderate synthetic growth defect, whereas depletion of DipM in  $\Delta ftsE$  or  $\Delta ldpF$  cells was synthetic lethal (Fig 5). The

synthetic defects associated with loss of DipM with FtsE, LdpF, or AmiC as well as the distinct morphology of  $\Delta dipM$  cells [25-27] suggests that DipM operates in a non-redundant, parallel hydrolytic pathway. We also hypothesize, based on the strong synthetic interactions between AmiC and FtsE or LdpF but only mild synthetic defects associated with loss of FtsE and LdpF, that AmiC operates in a hydrolytic pathway separate from FtsE and LdpF. However, it is apparent that all three putative PG hydrolytic pathways contribute to the efficiency of cell separation in *C. crescentus*.

Interestingly, in a transposon deep-sequencing analysis to uncover transposon insertions that alter the competitive fitness of  $\Delta spmX$  cells, the *ftsE* and *ldpF* loci were the first and second least favored insertion sites, respectively, in  $\Delta spmX$  cells as compared to WT [28]. We therefore tested for synthetic interactions between *ftsE* and *spmX*, which encodes a muramidase homolog that localizes to the stalked cell pole and controls the swarmer-to-stalk cell transition [29]. Consistent with the  $\Delta spmX$  transposon deep-sequencing results, we observed severe synthetic growth and morphological defects for  $\Delta ftsE\Delta spmX$  cells, implicating FtsE and LdpF in the stalked pole development pathway, likely through a connection to cell wall remodeling (Fig 5E).

## **The CC domain of LdpF interacts with the ECL of FtsX, but LdpF does not activate AmiC PG hydrolysis *in vitro***

To provide biochemical support for our *in vivo* findings, we purified LdpF, AmiC, DipM, and the ECL of FtsX, and monitored PG degradation using an *in vitro* dye release assay [30,23]. Although bacterial two hybrid showed a positive interaction for the ECL of FtsX

and the CC domain of LdpF, we did not observe LdpF-activated AmiC PG hydrolysis *in vitro* (Fig S2; S1 Text). Interestingly, the LytM domain of DipM was sufficient to mildly stimulate AmiC hydrolase activity *in vitro* (Fig S2C; S1 Text). However, as *C. crescentus* DipM and AmiC are most similar to the *E. coli* activator-amidase pair, NlpD and AmiC, perhaps this result is unsurprising. In light of the distinct phenotypes of cells lacking DipM and AmiC, however, we suspect that DipM has activities in addition to the regulation of AmiC. Collectively, our genetic and biochemical evidence indicate at least three hydrolytic pathways in *C. crescentus* and implicate a yet unidentified downstream target of FtsEX-LdpF in the regulation of PG metabolism.

## **Electron cryotomography reveals unique cell envelope organization at chaining sites**

Our genetic evidence is consistent with a role for FtsEX in regulating cell wall hydrolysis for cell separation. Although TEM highlighted the general cell separation defects of  $\Delta ftsE$  cells (Fig 1), electron cryotomography (ECT) allowed us to dissect the exact stages at which these cells are blocked during division (Fig 6). To capture the cell envelope organization at the skinny cell-cell connections, we imaged cells lacking both FtsE and AmiC since loss of AmiC exacerbates the  $\Delta ftsE$  chaining phenotype (Fig 4). In five out of six tomograms, we could identify with certainty the presence of all layers of the cell envelope in the skinny connections between chained cell bodies (Fig 6). Four of these had obvious cytoplasmic volume between the unfused inner membranes. In at least one example, however, the inner membranes were closely stacked on top of each other, but not fused (Fig 6).

In WT *C. crescentus*, the final stages of inner membrane fission are rapid, and the smallest diameter for inner membrane connections that have been captured by ECT are ~60 nm [31]. In cells lacking FtsE and AmiC with fairly uniform connections (Fig 6B, D), we observed inner membrane diameters ranging from ~12 to 60 nm. Others were more variable and had intermittent bulging, with inner membrane diameters ranging from ~20 to 300 nm within a single cell-cell connection (Figs 6C, S3). This organization of the cell envelope is strikingly different from other mutants deficient in cell wall hydrolysis. *E. coli* cells lacking EnvC and NlpD or all four LytM-domain containing factors complete inner membrane fusion and cytoplasmic compartmentalization, but struggle to constrict their outer membrane due to a layer of intact PG between adjacent chained cells [22]. Similarly,  $\Delta dipM$  cells form chains with fused inner membranes and thick, multilayered PG between cell bodies [25,26]. Therefore, the cell envelope organization of cells lacking FtsE and AmiC, namely the continuous cytoplasmic connections and narrow spacing between the inner membranes, represents a unique cell separation phenotype and, potentially, a novel pathway for cell separation in *C. crescentus*.

**$\Delta ftsE$  thin connections are morphologically stalk-like and enriched for stalk proteins**

During its dimorphic life cycle, *C. crescentus* elaborates a polar stalk, a tubular extension of the cell envelope important for nutrient uptake [32]. ECT of cells lacking FtsE and AmiC reinforced an observation we had previously made based on TEM of  $\Delta ftsE$ , namely, the striking morphological similarities between the extended connections of *ftsE* mutants and *C. crescentus* stalks (Figs 1, 6). In addition to sharing approximate widths (~12-300 nm inner membrane diameter for the skinny connections; ~20-40 nm inner

membrane diameter for the stalks) and cell envelope organization, we occasionally observed electron dense structures that spanned the short axis of the cell envelope of the thin connections (Fig 6). These structures were reminiscent of stalk cross-bands, multiprotein assemblies that transect the stalk at regular intervals and function as diffusion barriers to compartmentalize stalk and cell body periplasmic and membrane proteins (Figs 6A,C, D, S3) [33].

Since stalk growth occurs by incorporation of new material at the cell body-stalk junction [32], we monitored HADA incorporation at the extended constrictions of *ftsE* mutants. In general, we observed incorporation of new cell wall material throughout the skinny connections (Fig S4), which contrasts with the pattern of *de novo* PG synthesis only at the base of stalks. There are two modes of zonal PG synthesis in *C. crescentus*: FtsZ-independent PG incorporation at the base of the stalk and FtsZ-dependent PG incorporation at midcell [19]. Interestingly, in  $\Delta ftsE$  cells, FtsZ is not enriched at the skinny connections suggesting that the new cell wall synthesis occurring throughout the skinny connections is an FtsZ-independent process similar to PG synthesis at the base of the stalk (Fig S4).

Motivated by the morphological similarities between the extended constrictions in  $\Delta ftsE$  cells and *C. crescentus* stalks, we asked if any stalk-specific proteins could localize to the skinny connections. StpX is a bitopic membrane protein enriched in the stalk that regulates stalk length [34]. We expressed *stpX-cfp* in WT,  $\Delta ftsE$ , and  $\Delta ftsE$  cells lacking AmiC: StpX-CFP localized to the stalks in all genetic backgrounds, but strikingly, was

also enriched at the skinny constrictions in the *ftsE* mutant cells (Fig 7A). The bifunctional penicillin binding protein, PbpC, is involved in stalk elongation [35] and is required to sequester StpX at the stalk in WT *C. crescentus* [37]. To investigate the localization dependency of StpX to the skinny constrictions, we expressed *stpX-cfp* in a  $\Delta ftsE \Delta pbpC$  mutant background. Consistent with previous reports, StpX-CFP was not enriched in stalks in cells lacking both FtsE and PbpC. However, StpX-CFP was also not enriched at the skinny connections between cells and instead was diffusely localized at the cell periphery (Fig 7B). We also expressed *pbpC-yfp* in WT and  $\Delta ftsE$  cells and observed enrichment at the base of stalks as well as frequent localization to the skinny connections in the *ftsE* mutant (Fig 7C). Since we observe enrichment of both PbpC and StpX at the skinny connections in  $\Delta ftsE$  cells, we hypothesize that PbpC initially recruits StpX to the skinny connections and promotes its retention at those sites.

Considering the presence of both PbpC and StpX at the skinny connections in the *ftsE* mutant, we monitored the localization of the stalk cross-band protein, StpB. StpB-mCherry localized as puncta in the stalks of WT,  $\Delta ftsE$ , and  $\Delta ftsE$  cells lacking AmiC, but was not enriched at the extended constriction sites (Fig. 7D). Consequently, the proteinaceous, envelope-spanning discs observed in the *ftsE* mutant by ECT (Fig 6) may not, in fact, be cross-bands or may differ in molecular composition from stalk cross-bands. We conclude that the skinny connections share numerous morphological and molecular similarities with stalks, but the two structures are not physically or biochemically identical.



## Discussion

The role of FtsEX in synchronizing PG remodeling with cell division appears to be conserved amongst distantly related bacterial species such as *E. coli*, *S. pneumoniae*, and *M. tuberculosis*, although the downstream adaptor or enzyme targets vary [7-11]. We provide evidence that this paradigm also extends to the  $\alpha$ -proteobacterium *C. crescentus*. Our data indicate that FtsE is important for initial Z-ring assembly and regulates Z-ring structure in a manner dependent on its stoichiometry with FtsX (Figs 2, 3, 8A). Different levels of FtsE or FtsEX not only affect FtsZ localization, but also FtsZ function, namely its ability to localize incorporation of new cell wall material (Fig 3). Additionally, our data implicate FtsEX in a cell wall metabolic pathway involving LdpF and an unidentified downstream cell wall factor regulated by LdpF (Fig 4, 8B). Thus *C. crescentus* FtsEX, similar to what has been proposed in *E. coli*, may synchronize PG remodeling with Z-ring constriction during division [9]. ECT of the skinny connections in  $\Delta ftsE$  revealed a cell envelope architecture remarkably distinct from *E. coli* hydrolase mutants, however, and an overall morphology that was strikingly stalk-like (Fig 6). Enrichment for stalk proteins StpX and PbpC at the skinny constrictions in  $\Delta ftsE$  and a strong genetic interaction between *ftsE* and the stalked cell fate determinant *spmX* further support mechanistic overlap between the elaboration of thin connections in *ftsE* mutants and stalk development (Figs 5, 7, 8A).

During the late stages of division in *C. crescentus*, constriction of the inner membrane proceeds until the inner membranes of the two future daughter cell compartments are connected only by a small tubular structure [31]. Out of thousands of cells Judd and

colleagues examined in their study, only five displayed inner membranes with diameters less than ~100 nm and the smallest inner membrane connection was 60 nm in diameter [31]. ECT of cells lacking FtsE and AmiC with fairly uniform connections showed inner membrane diameters ranging from ~12 to 60 nm (Fig 6). Thus, the majority of cells lacking FtsE and AmiC have inner membrane diameters that fall well below the lowest threshold reported for inner membrane diameters at any stage of WT cell division. Furthermore, WT cells spend a short amount of time in these late, transitional stages, perhaps only a few seconds, and membrane topology changes very rapidly [31]. In the case of *ftsE* mutant cells, the thin connections are abundant in a mixed cell population and, based on their nearly abutting inner membranes, are likely blocked or delayed at a terminal stage just prior to inner membrane fission. In WT *C. crescentus*, the mechanisms underlying rapid terminal constriction and membrane fusion are unknown [31]. Our data indicate that FtsEX is important for inner membrane fusion, either directly or indirectly, and that in the absence of FtsE, inner membrane fusion frequently fails, PG synthesis continues, and cells elaborate a stalk-like structure.

Understanding how proteins are targeted specifically to the stalk is important for understanding mechanisms of subcellular organization in bacteria as well as stalk function [36]. We have limited knowledge about the molecular pathways responsible for targeting proteins to the stalk; however, stalked pole geometry, membrane curvature, or unique peptidoglycan motifs are possible mechanisms for protein localization at the stalk. The observation that both StpX and PbpC localize to the skinny connections in  $\Delta ftsE$  cells provides an experimental handle for understanding stalk biogenesis and stalk protein

localization cues. In WT *C. crescentus*, the bactofilins, BacA and BacB, localize at the stalked pole and recruit PbpC during the swarmer-to-stalked cell transition [35]. We have not monitored the localization of the bactofilins in  $\Delta ftsE$  cells, but we predict that they would localize at the skinny connections upstream of PbpC, similar to the protein recruitment hierarchy observed for stalks. It has been proposed that the membrane curvature at the stalk-cell body junction drives BacAB clusters to localize there [35]. These BacAB clusters could likewise recruit PbpC and StpX to the junctions between the cell bodies and skinny connections in  $\Delta ftsE$  on the basis of shared membrane curvature with the cell body-stalk junction. Additionally, the composition of the peptidoglycan is purportedly distinct between the cell body and the stalk [37], as stalks are more resistant to lysozyme treatment [38]. PbpC may regulate the rigidity of the stalk by dictating a specific cell wall remodeling regime, which may also be active at the skinny connections [35]. The periplasmic N-terminal domain of StpX is required for its stalk localization and may recognize PbpC-specific changes in PG chemistry, leading to sequestration of StpX in the stalk and the skinny constrictions of  $\Delta ftsE$  cells [34].

Within  $\alpha$ -proteobacteria, asymmetric patterns of growth are particularly well-represented in the orders *Rhizobiales* and *Caulobacterales* [39]. Unlike *C. crescentus*, which divides by asymmetric binary fission, *Rhodomicrobium vannelliei* and *Hyphomonas neptunium*, members of *Rhizobiales* and *Caulobacterales* respectively, use a budding mechanism whereby new offspring emerges from the tip of a stalk structure [40,39]. Cell division thus occurs in an extremely asymmetric manner at the bud neck, producing a stalked mother cell and a non-stalked daughter cell [39]. After initially increasing in cell size by

dispersed PG incorporation, *H. neptunium* displays a period of zonal growth at the new cell pole leading to the elaboration of a stalk structure [39]. This type of stalk outgrowth is similar to what occurs in other stalked  $\alpha$ -proteobacteria like *C. crescentus*, which suggests conservation of core machinery. The asymmetric manner in which *H. neptunium* divides exemplifies how stalks may function not only as specialized organelles, but also as division planes, depending on the bacterial species [39]. The morphology of  $\Delta ftsE$  cells, with thin, stalk-like extensions between cell bodies is reminiscent of a predivisional *H. neptunium* cell where the stalk is closely integrated within the cell division program.

While specialized protein machineries exist for cell division and cell elongation, there is no single protein, much less entire machinery, absolutely and specifically required for stalk formation. Since the elongation machinery proteins MreB and RodA contribute to stalk growth and morphogenesis, stalk synthesis has been proposed to be a specialized form of cell elongation [41]. Thus, it is possible that the skinny, stalk-like connections between cell bodies in  $\Delta ftsE$  are a result of a modified form of cell elongation, similar to what has been postulated for stalks [41]. Our data suggest that although the slender connections in  $\Delta ftsE$  share certain morphological and molecular features with stalks, they are not, in actuality, ectopic stalks forming at failed division sites: the spatial pattern of PG incorporation is distinct from stalks, the diameters are not as homogeneous as for stalks, and StpB does not localize at the skinny connections (Figs S3, 6, 7). We instead favor the hypothesis that when  $\Delta ftsE$  cells stall at a late stage in division, the division machinery disengages and the cell elongation machinery takes over and elaborates a thin,

stalk-like connection. We interpret this phenomenon as an example of morphogenetic plasticity, whereby small changes to established morphogenetic machineries give rise to novel or, in the case of  $\Delta ftsE$ , modified forms of preexisting structures. Overall, our findings have important implications for understanding late stage division regulation, stalk formation, and the coordination of morphogenetic events and machineries in *C. crescentus*. Loss of FtsE has revealed unexpected morphogenetic plasticity between the division and stalk synthesis programs and offers insight into the geneses of diverse morphologies in bacteria.

482

## 483 **Materials and Methods**

### 484 *Growth conditions for bacterial strains*

485 *C. crescentus* NA1000 strains were grown in peptone yeast extract (PYE) medium at  
 486 30°C [42]. Additives and antibiotics were used at the following concentrations in liquid  
 487 (solid) media for *C. crescentus*: xylose 0.3 (0.3)%, glucose 0.2 (0.2)%, vanillate 0.5 (0.5)  
 488 mM, gentamycin 1 (5)  $\mu\text{g ml}^{-1}$ , kanamycin 5 (25)  $\mu\text{g ml}^{-1}$ , spectinomycin 25 (100)  $\mu\text{g ml}^{-1}$ , streptomycin (5  $\mu\text{g ml}^{-1}$ ). Before changes in induction conditions, cells were washed  
 489 two to three times in plain media. Growth rate analyses were performed in 96-well plates  
 490 with shaking at 30°C using a Tecan Infinite 200 Pro plate reader. Strains and plasmids  
 491 used in this study are included as Supporting Information Table S1.

493

### 494 *Light microscopy and image analysis*

495 Cells were imaged during the log phase of growth after immobilization on 1% agarose  
 496 pads. Light microscopy was performed on a Nikon Eclipse Ti inverted microscope  
 497 equipped with a Nikon Plan Fluor x 100 (numeric aperture 1.30) oil Ph3 objective and  
 498 Photometrics CoolSNAP HQ cooled CCD (charge-coupled device) camera. Chroma  
 499 filter cubes were used as follows: ET-EYFP for YFP and ET-ECFP for CFP, ET-dsRED  
 500 for mCherry and ET-ECFP for HADA. Images were processed in Adobe Photoshop.  
 501 Automated cell length analysis was performed using Oufiti or MicrobeTracker [43]. In  
 502 MicrobeTracker, algorithm 4 was used for determining cell outlines, with the following  
 503 parameter change: areaMin=150.

504

## **Whole cell TEM**

Cells from EG864 and EG1133 were grown in PYE and prepared for whole cell TEM exactly as described [42].

## **HADA labeling**

Cells from strains EG213, EG379, EG864, EG930, EG1133, EG1252, EG1272, and EG1863 were grown in PYE. HADA [20] was added to 0.41 mM and the cultures were returned to the shaker for 5 min. The cells were then washed twice with PBS and resuspended in PBS before imaging [42].

## **Bacterial two-hybrid**

The T18 and T25 plasmids were co-transformed into BTH101 (*F*-, *cya*-99, *araD*139, *galE*15, *galK*16, *rpsL*1 (*Str*<sup>r</sup>), *hsdR*2, *mcrA*1, *mcrB*1; Euromedex) competent cells, plated onto LB agar with ampicillin (100 µg/µl) and kanamycin (50 µg/µl), and incubated overnight at 30°C. Several colonies were inoculated into LB with ampicillin (100 µg/µl), kanamycin (50 µg/µl), and IPTG (0.5 mM) and incubated at 30°C overnight. The next morning 2 µl of each culture was spotted onto plates containing ampicillin, kanamycin, X-gal (40 µg/ml), and IPTG (0.5 mM) and incubated for 1-2 days at 30°C. Positive interactions were indicated by blue colonies. Every interaction was tested in triplicate.

## **Electron cryotomography (ECT)**

For ECT imaging, strain EG1863 was grown in PYE with xylose. Once in log phase, EG1863 was washed twice with PYE and resuspended in PYE without xylose to deplete

AmiC. EG1863 was then grown in PYE without xylose for ~6 h, transferred to an eppendorf tube, and shipped on ice to Grant Jensen's lab at Caltech. The total amount of time the cells spent on ice was ~24 h. We imaged and monitored CFUs of EG1863 cells before shipment and after 24 h of incubation on ice and observed similar growth and morphology. Upon arrival, 1 ml of the EG1863 culture was centrifuged at 3000 rpm for 5 min and resuspended in fresh PYE to a final OD<sub>600</sub> of ~8. This resuspension was mixed with fiducial markers (10 nm gold beads treated with bovine serum albumin to prevent aggregation) and 2 µl of the resuspension mixture was plunge-frozen on EM grids in a mixture of liquid ethane and propane [44]. Images were acquired using a 300 keV Polara transmission electron microscope (FEI) equipped with a GIF energy filter (Gatan) and a K2 Summit direct detector (Gatan). Tilt-series were collected from -50° to +50° in 1° increments at magnification of 22,500X using UCSF Tomography software [45] with a defocus of -12 µm and total dosage of 180 e<sup>-</sup>/Å<sup>2</sup>. Tomograms were calculated using IMOD software [46].

### ***Protein purification***

Rosetta pLysS *E. coli* cells containing overexpression plasmids for AmiC, LdpF, DipM, and truncated LytM domain protein variants, all with a His<sub>6</sub>-SUMO tag fused to the N-terminus, were purified as described previously with minor changes [15]. Rosetta cells containing the constructs were grown in 1 L of LB at 30°C to an OD<sub>600</sub> of 0.4 and then induced with 1 mM IPTG for 4 h. Cells were collected by centrifugation at 6000 x g at 4°C for 10 minutes and resuspended in 40 ml Column Buffer A (CBA: 50 mM Tris-HCl pH 8.0, 300 mM NaCl, 10% glycerol, 20 mM imidazole) per 1 L of culture. Cells were



snap-frozen in liquid nitrogen and stored at -80°C until use. Pellets were thawed at 37°C and lysozyme was added to 1 µg/ml and MgCl<sub>2</sub> to 2.5 mM. Cell suspensions were left on ice for 45 minutes, then sonicated and centrifuged for 30 minutes at 15,000 x g at 4°C. The protein supernatant was filtered and loaded onto a HisTrap FF 1ml column (GE Life Sciences) pre-equilibrated with CBA. The protein was eluted with 30% Column Buffer B (same as CBA except with 1M imidazole). The protein fractions were combined and His<sub>6</sub>-Ulp1 (SUMO protease) was added (1:500 Ulp1:protein molar ratio). The protease and protein fractions were dialyzed overnight at 4°C into CBA. Cleaved protein was run over the same HisTrap FF 1mL column equilibrated in CBA and the flow-through was collected. Flow-through fractions were dialyzed overnight at 4°C into Storage Buffer (50 mM HEPES-NaOH pH 7.2, 150 mM NaCl, 10% glycerol). Dialyzed protein was then concentrated (if needed), snap-frozen in liquid-nitrogen, and stored at -80°C.

#### ***RBB labeled sacculi preparation***

Sacculi were prepared from strain EG865 as described in [23]. *C. crescentus* cells were grown in 1 L of PYE at 30°C, collected at an OD<sub>600</sub> of 0.6 by centrifugation at 6,000 x g for 10 minutes, and resuspended in 10 ml of PBS. The cell suspension was added drop wise to 80 ml of boiling 4% sodium dodecyl sulfate (SDS) solution. Cells were boiled and mixed for 30 minutes and then incubated overnight at room temperature. Sacculi were then pelleted by ultra-centrifugation at ~80,000 x g for 60 minutes at 25°C. Pelleted sacculi were then washed four times with ultra-pure water and resuspended in 1 ml of PBS and 20 µl of 10 mg/ml amylase and incubated at 30°C overnight. The next day, sacculi were pelleted at ~400,000 x g for 15 minutes at room temperature, washed three

times with ultra-pure water, and resuspended in 1 ml of water. The sacculi suspension was labeled with 0.4 ml of 0.2 M remazol-brilliant blue (RBB), 0.3 ml 5 M NaOH, and 4.1 ml of water, and incubated at 30°C overnight. The labeled solution was neutralized with 0.4 ml of 5 M HCl and 0.75 ml of 10X PBS. Labeled sacculi were pelleted at 16,000 x g for 20 minutes at room temperature. The pellet was washed with water until the supernatant was clear. Blue-labelled sacculi were resuspended in 1 ml of 0.2% azide, incubated at 65°C for 3 hours, and then stored at 4°C.

#### ***Dye-release assay***

The dye release assay was adapted from [23]. Briefly, 10 µl of RBB-labeled sacculi was incubated at 30°C for 3 hours with AmiC, LdpF variants, DipM variants, or FtsX ECL singly or in combination. All proteins were used at 4 µM. Total reaction volumes were brought to 100 µl with PBS. Lysozyme (4 µM) was used as a positive control. After 3 hours of incubation, reactions were heat inactivated at 95°C for 10 minutes and centrifuged for 20 minutes at 16,000 x g. Supernatants were collected and the absorbance was measured at OD<sub>595</sub>.

597

## 598 **Acknowledgements**

599 We thank Jasmine Burrell for her work characterizing stalk protein localization in  $\Delta ftsE$ ;  
600 Martin Thanbichler for sharing plasmids, strains and preliminary LdpF data; Yves Brun,  
601 Erkin Kuru, and Michael van Nieuwehnze for HADA; Yves Brun and Ellen Quardokus  
602 for assistance with TEM and for sharing the StpX-GFP plasmid; and Zhuo Li for  
603 providing the wild-type stalks images in Fig. S3. This work was supported in part by the  
604 National Institutes of Health grants R35 GM122588 (to GJJ) and R01 GM108640 (to  
605 EDG).

606

607

608

609

610

611

612

613

614

615

616

617

618

619

620

## 621 **References**

- 622       1. Jiang C, Caccamo PD, Brun YV. Mechanisms of bacterial morphogenesis:  
623           evolutionary biology approaches provide new insights. *Bioessays*. 2015;37(4):  
624           413-25.
- 625       2. Typas A, Banzhaf M, Gross CA, Vollmer W. From the regulation of  
626           peptidoglycan synthesis to bacterial growth and morphology. *Nat Rev Microbiol*.  
627           2011;10(2): 123-36. doi: 10.1038/nrmicro2677.
- 628       3. Woldemeskel SA and Goley ED. Shapeshifting to survive: shape determination  
629           and regulation in *Caulobacter crescentus*. *Trends Microbiol*. 2017; doi:  
630           <http://dx.doi.org/10.1016/j.tim.2017.03.006>. In press corrected proof.
- 631       4. Curtis PD and Brun YV. Getting in the loop: regulation of development in  
632           *Caulobacter crescentus*. *Microbiol Mol Biol Rev*. 2010;74(1): 13-41.
- 633       5. Meier EL and Goley ED. Form and function of the bacterial cytokinetic ring. *Curr*  
634           *Opin Cell Biol*. 2014;26: 19-27. doi: 10.1016/j.ceb.2013.08.006.
- 635       6. Schmidt KL, Peterson ND, Kustusch RJ, Wissel MC, Graham B, Phillips GJ, et  
636           al. A predicted ABC transporter, FtsEX, is needed for cell division in *Escherichia*  
637           *coli*. *J Bacteriol*. 2004;186(3): 785-93.
- 638       7. Sham LT, Barendt SM, Kopecky KE, Winkler ME. Essential PcsB putative  
639           peptidoglycan hydrolase interacts with the essential FtsXSpn cell division protein  
640           in *Streptococcus pneumoniae* D39. *Proc Natl Acad Sci USA*. 2011;108(45):  
641           E1061-9. doi: 10.1073/pnas.1108323108.

8. Sham LT, Jensen KR, Bruce KE, Winkler ME. Involvement of FtsE ATPase and FtsX extracellular loops 1 and 2 in FtsEX-PcsB complex function in cell division of *Streptococcus pneumoniae* D39. *MBio*. 2013;4(4). pii: e00431-13. doi: 10.1128/mBio.00431-13.
9. Yang DC, Peters NT, Parzych KR, Uehara T, Markovski M, Bernhardt TG. An ATP-binding cassette transporter-like complex governs cell-wall hydrolysis at the bacterial cytokinetic ring. *Proc Natl Acad USA*. 2011;108(45): E1052-60. doi: 10.1073/pnas.1107780108.
10. Meisner J, Montero Llopis P, Sham LT, Garner E, Bernhardt TG, Rudner DZ. FtsEX is required for CwlO peptidoglycan hydrolase activity during cell wall elongation in *Bacillus subtilis*. *Mol Microbiol*. 2013;89(6): 1069-83. doi: 10.1111/mmi.12330.
11. Mavrici D, Marakalala MJ, Holton JM, Prigozhin DM, Gee CL, Zhang YJ. *Mycobacterium tuberculosis* FtsX extracellular domain activates the peptidoglycan hydrolase, RipC. *Proc Natl Acad Sci USA*. 2014;111(22): 8037-42. doi: 10.1073/pnas.1321812111.
12. Arends SJ, Kustus RJ, Weiss DS. ATP-binding site lesions in FtsE impair cell division. *J Bacteriol*. 2009;191(12): 3772-84. doi: 10.1128/JB.00179-09.
13. Corbin BD, Wang Y, Beuria TK, Margolin W. Interaction between cell division proteins FtsE and FtsZ. *J Bacteriol*. 2007;189(8): 3026-35.
14. Goley ED, Yeh YC, Hong SH, Fero MJ, Abeliuk E, McAdams HH, et al. Assembly of the *Caulobacter* cell division machine. *Mol Microbiol*. 2011;80(6): 1680-98. doi: 10.1111/j.1365-2958.2011.07677.

- 665 15. Meier EL, Razavi S, Inoue T, Goley ED. A novel membrane anchor for FtsZ is  
666 linked to cell wall hydrolysis in *Caulobacter crescentus*. *Mol Microbiol*.  
667 2016;101(2): 265-80. doi: 10.1111/mmi.13388.
- 668 16. Christen B, Abeliuk E, Collier JM, Kalogeraki VS, Passarelli B, Collier JA, et al.  
669 The essential genome of a bacterium. *Mol Syst Biol*. 2011;7: 528. doi:  
670 10.1038/msb.2011.58.
- 671 17. Buss J, Coltharp C, Huang T, Pohlmeier C, Wang SC, Hatem C, et al. In vivo  
672 organization of the FtsZ-ring by ZapA and ZapB revealed by quantitative super-  
673 resolution microscopy. *Mol Microbiol*. 2013;89(6): 1099-120. doi:  
674 10.1111/mmi.12331.
- 675 18. Thanbichler M and Shapiro L. MipZ, a spatial regulator coordinating  
676 chromosome segregation with cell division in *Caulobacter*. *Cell*. 2006;126(1):  
677 147-62.
- 678 19. Aaron M, Charbon G, Lam H, Schwarz H, Vollmer W, Jacobs-Wagner C. The  
679 tubulin homologue FtsZ contributes to cell elongation by guiding cell wall  
680 precursor synthesis in *Caulobacter crescentus*. *Mol Microbiol*. 2007;64(4): 938-  
681 52.
- 682 20. Kuru E, Hughes HV, Brown PJ, Hall E, Tekkam S, Cava F, et al. In Situ probing  
683 of newly synthesized peptidoglycan in live bacteria with fluorescent D-amino  
684 acids. *Angew Chem Int Ed Engl*. 2012;51(50): 12519-23. doi:  
685 10.1002/anie.201206749.
- 686 21. Heidrich C, Templin MF, Ursinus A, Merdanovic M, Berger J, Schwarz H, et al.  
687 Involvement of N-acetylmuramyl-L-alanine amidases in cell separation and

antibiotic-induced autolysis of *Escherichia coli*. *Mol Microbiol.* 2001;41(1): 167-78.

22. Uehara T, Dinh T, Bernhardt TG. LytM-domain factors are required for daughter cell separation and rapid ampicillin-induced lysis in *Escherichia coli*. *J Bacteriol.* 2009;191(16): 5094-107. doi: 10.1128/JB.00505-09.

23. Uehara T, Parzych KR, Dinh T, Bernhardt TG. Daughter cell separation is controlled by cytokinetic ring-activated cell wall hydrolysis. *EMBO J.* 2010;29(8): 1412-22. doi: 10.1038/emboj.2010.36.

24. Nierman WC, Feldblyum TV, Laub MT, Paulsen IT, Nelson KE, Eisen JA, et al. Complete genome sequence of *Caulobacter crescentus*. *Proc Natl Acad Sci USA.* 2001;98(7): 4136-41.

25. Moll A, Schlimpert S, Briegel A, Jensen GJ, Thanbichler M. DipM, a new factor required for peptidoglycan remodeling during cell division in *Caulobacter crescentus*. *Mol Microbiol.* 2010;77(1): 90-107. doi: 10.1111/j.1365-2958.2010.07224.

26. Goley ED, Comolli LR, Fero KE, Downing KH, Shapiro L. DipM links peptidoglycan remodeling to outer membrane organization in *Caulobacter*. *Mol Microbiol.* 2010;77(1): 56-73. doi: 10.1111/j.1365-2958.2010.07222.

27. Pogglio S, Takacs CN, Vollmer W, Jacobs-Wagner C. A protein critical for cell constriction in the Gram-negative bacterium *Caulobacter crescentus* localizes at the division site through its peptidoglycan-binding LysM domains. *Mol Microbiol.* 2010;77(1): 74-89. doi: 10.1111/j.1365-2958.2010.07223.

28. Janakiraman B, Mignolet J, Narayanan S, Viollier PH, Radhakrishnan SK. In-phase oscillation of global regulons is orchestrated by a pole-specific organizer. *Proc Natl Acad Sci USA*. 2016;113(44): 12550-12555.
29. Radhakrishnan SK, Thanbichler M, Viollier PH. The dynamic interplay between a cell fate determinant and a lysozyme homolog drives the asymmetric division cycle of *Caulobacter crescentus*. *Genes Dev*. 2008;22(2): 212-25. doi: 10.1101/gad.1601808.
30. Zhou R, Chen S, Recsei P. A dye release assay for determination of lysostaphin activity. *Anal Biochem*. 1988;171(1): 141-4.
31. Judd EM, Comolli LR, Chen JC, Downing KH, Moerner WE, McAdams HH. Distinct constrictive processes, separated in time and space, divide *Caulobacter* inner and outer membranes. *J Bacteriol*. 2005;187(20): 6874-82.
32. Wagner JK and Brun YV. Out on a limb: how the *Caulobacter* stalk can boost the study of bacterial cell shape. *Mol Microbiol*. 2007;64(1): 28-33.
33. Schlimpert S, Klein EA, Briegel A, Hughes V, Kahnt J, Bolte K, et al. General protein diffusion barriers create compartments within bacterial cells. *Cell*. 2012;151(6): 1270-82. doi: 10.1016/j.cell.2012.10.046.
34. Hughes HV, Huitema E, Pritchard S, Keiler KC, Brun YV, Viollier PH. Protein localization and dynamics within a bacterial organelle. *Proc Natl Acad Sci USA*. 2010;107(12): 5599-604. doi: 10.1073/pnas.0909119107.
35. Kuhn J, Briegel A, Morschel E, Kahnt J, Leser K, Wick S, et al. Bactofilins, a ubiquitous class of cytoskeletal proteins mediating polar localization of a cell wall



732           synthase in *Caulobacter crescentus*. EMBO J. 2010;29(2): 327-39. doi:  
733           10.1038/emboj.2009.358.

734       36. Hughes HV, Lisher JP, Hardy GG, Kysela DT, Arnold RJ, Giedroc DP, et al. Co-  
735           ordinate synthesis and protein localization in a bacterial organelle by the action of  
736           a penicillin binding-protein. Mol Microbiol. 2013;90(6): 1162-77. doi:  
737           10.1111/mmi.12422.

738       37. Poindexter JS and Hagenzieker JG. Novel peptidoglycans in *Caulobacter* and  
739           *Asticcacaulis* spp. J Bacteriol. 1982;150(1): 332-47.

740       38. Schmidt JM and Stanier RY. The development of cellular stalks in bacteria. J Cell  
741           Biol. 1966;28(3): 423-36.

742       39. Cserti E, Roskopf S, Chang YW, Eisehuer S, Selter L, Shi J, et al. Dynamics of  
743           the peptidoglycan biosynthetic machinery in the stalked budding bacterium  
744           *Hyphomonas neptunium*. Mol Microbiol. 2016;103(5): 875-895. doi:  
745           10.1111/mmi.13593.

746       40. Whittenbury R and Dow CS. Morphogenesis and differentiation in  
747           *Rhodocyclidium vanniellii* and other budding and prosthecate bacteria. Bacteriol  
748           Rev. 1977;41(3): 754-808.

749       41. Wagner JK, Galvani CD, Brun YV. *Caulobacter crescentus* requires RodA and  
750           MreB for stalk synthesis and prevention of ectopic pole formation. J Bacteriol.  
751           2005;187(2): 544-53.

752       42. Sundararajan K, Miguel A, Desmarais SM, Meier EL, Casey Huang K, Goley ED.  
753           The bacterial tubulin FtsZ requires its intrinsically disordered linker to direct

754 robust cell wall construction. Nat Commun. 2015;6: 7281. doi:  
755 10.1038/ncomms8281.

756 43. Sliusarenko O, Heinritz J, Emonet T, Jacobs-Wagner C. High-throughput,  
757 subpixel precision analysis of bacterial morphogenesis and intracellular spatio-  
758 temporal dynamics. Mol Microbiol. 2011;80(3): 612-27. doi: 10.1111/j.1365-  
759 2958.2011.07579.

760 44. Tivol WF, Briegel A, Jensen GJ. An improved cryogen for plunge freezing.  
761 Microsc Microanal. 2008;14: 375-9.

762 45. Zheng SQ, Keszthelyi B, Branlund E, Lyle JM, Braunfeld MB, Sedat JW, et al.  
763 UCSF tomography: an integrated software suite for real-time electron  
764 microscopic tomographic data collection, alignment, and reconstruction. J Struct  
765 Biol. 2007;157: 138-47.

766 46. Kremer JR, Mastronarde DN, McIntosh JR. Computer visualization of three-  
767 dimensional image data using IMOD. J Struct Biol. 1996;116: 71-6.

768

769

770

771

772

773

774

775

776

## Figure captions

**Fig 1.** Transmission electron microscopy (TEM) of chained  $\Delta ftsE$  cells with thin, extended connections between cell bodies.

(A) Micrograph of WT cells. (B) Micrographs of  $\Delta ftsE$  cells. \* = stalk; # = skinny connection. Scale bar = 2  $\mu$ m.

**Fig 2.** *ftsE* has synthetic growth, cell length, and Z-ring structural defects with Z-ring regulator *zapA*.

(A) Phase contrast micrographs of  $\Delta ftsE$ ,  $\Delta zapA$ , and  $\Delta ftsE\Delta zapA$  cells. (B) Growth curves of strains in (A). Doubling time (h)  $\pm$  SEM: EG1080 =  $1.78 \pm 0.01$ ; EG1133 =  $1.81 \pm 0.02$ ; EG1745 =  $1.86 \pm 0.02$ . Differences between strain doubling times were ns by one-way ANOVA. (C) Cell length analyses of strains in (A). Mean cell length ( $\mu$ m)  $\pm$  SEM: EG1080 =  $2.54 \pm 0.03$ ; EG1133 =  $3.50 \pm 0.11$ ; EG1745 =  $3.94 \pm 0.10$ . All pairwise comparisons of mean cell lengths yielded p values  $< 0.01$  by one-way ANOVA. (D) FtsZ-CFP localization after 1 h of induction in WT,  $\Delta ftsE$ ,  $\Delta zapA$ , and  $\Delta ftsE\Delta zapA$  cells. # = focused Z-ring; \* = diffuse, punctate Z-ring. Scale bars = 2  $\mu$ m.

**Fig 3.** Overproducing FtsE or FtsEX causes filamentation and affects the localization of FtsZ and new PG.

(A) FtsZ-CFP localization after 1 h of induction in cells bearing an empty vector (EV) or overexpressing *ftsE* or *ftsEX* for 4 h. (B) MipZ-YFP localization in cells bearing and EV or overexpressing *ftsE* or *ftsEX* for 4 h. (C) HADA labeling of cells depleted for FtsZ for

4 h, bearing an EV, or overexpressing *ftsE* or *ftsEX* for 4 h. \* = ectopic poles. Scale bars  
= 2  $\mu$ m.

**Fig 4.** Synthetic genetic interactions between *amiC*, *ftsE*, and *ldpF*.

Phase contrast micrographs and serial spot dilutions of (A) WT,  $\Delta$ *ftsE*, and  $\Delta$ *ldpF*; (B) WT and  $\Delta$ *ftsE* cells depleted for AmiC for 24 h; (C) WT and  $\Delta$ *ldpF* cells depleted for AmiC for 24 h; (D) WT and  $\Delta$ *ldpF* cells depleted for FtsE for 24 h. Scale bar = 2  $\mu$ m.

**Fig 5.** Synthetic genetic interactions between *dipM* and *amiC*, *ftsE*, or *ldpF* and between *ftsE* and *spmX*.

Phase contrast micrographs and serial spot dilutions of (A) WT,  $\Delta$ *ftsE*, and  $\Delta$ *dipM*; (B) WT and  $\Delta$ *dipM* cells depleted for AmiC for 24 h; (C) WT and  $\Delta$ *ftsE* cells depleted for DipM for 24 h; (D) WT and  $\Delta$ *ldpF* cells depleted for DipM for 24 h; (E)  $\Delta$ *spmX* and  $\Delta$ *ftsE $\Delta$ *spmX*. Scale bar = 2  $\mu$ m.*

**Fig 6.** Electron cryotomography (ECT) of cells lacking FtsE and AmiC reveal stalk-like connections between cell bodies.

(A) WT *C. crescentus* stalk with cross-bands. (B) *ftsE* mutants with skinny connections most similar to stalks. (C) *ftsE* mutants with skinny connections that are stalk-like, but that have regions with heterogeneous widths. (D) *ftsE* mutants with skinny connections that are fairly short with inner membranes that are close together or nearly fused.

Abbreviations are as follows: OM = outer membrane, PG = peptidoglycan, IM = inner

membrane. # = cross-band; \* = cross-band-like structure. Scale bar (A) = 200 nm; Scale bars (B-D) = 100 nm.

**Fig 7.** Stalk specific proteins StpX and PbpC localize to the skinny constrictions in *ftsE* mutants.

(A) Localization of StpX-CFP induced for 18 h in WT,  $\Delta ftsE$  or  $\Delta ftsE$  cells depleted for AmiC for 18 h. (B) Localization of StpX-CFP induced for 2.75 h in  $\Delta ftsE\Delta pbpC$ . (C) Localization of Venus-PbpC induced for 2 h in WT or  $\Delta ftsE$ . (D) Localization of cross-band protein StpB-mCherry induced for 18 h in WT,  $\Delta ftsE$  or  $\Delta ftsE$  cells depleted for AmiC for 18 h. # = stalk enrichment; \* = skinny connection enrichment. Scale bars = 2  $\mu$ m.

**Fig 8.**

FtsEX-mediated regulation of constriction initiation and final cell separation reveals morphogenetic plasticity in *C. crescentus*.

(A) Cell cycle localization of FtsZ and stalk proteins in WT and  $\Delta ftsE$  cells. (B) Three putative cell separation pathways in *C. crescentus*.

## Supporting Information Captions

**Fig S1.** *In vivo* LdpF-mCherry has a diffuse, patchy localization in WT and  $\Delta ftsE$ .

(A) Predicted domain organization of *E. coli* EnvC and *C. crescentus* LdpF. (B)

Localization of LdpF-mCherry induced for 4 h in WT or  $\Delta ftsE$ . Abbreviations are as

follows: SS = signal sequence; CC = coiled coil domain; LytM = LytM domain. Scale bar

= 2  $\mu$ m.

**Fig S2.** LdpF binds the extracellular loop (ECL) of FtsX but does not activate AmiC *in*

*vitro*.

(A) Bacterial two-hybrid of T18 and T25 fusions to the ECL of FtsX, the coiled coil

domain (CC) of LdpF, and the CC cytoplasmic protein ZauP, which was used as a

negative control. (B,C) Dye release assay with RBB-labeled sacculi and purified variants

of AmiC, LdpF, DipM, and the ECL of FtsX. Each protein was used at 4  $\mu$ M and

reactions were incubated at 30°C for 3 h. Reactions were performed in triplicate. \*\*\* =

p < 0.0001 by one-way ANOVA.

**Fig S3.** Electron cryotomography (ECT) of cells lacking FtsE and AmiC reveal stalk-like

connections of heterogeneous widths.

(A) *ftsE* mutant with skinny connections that are stalk-like, but have regions with

heterogeneous widths. (B) WT *C. crescentus* stalks with cross-bands. # = cross-band.

Scale bar (A) = 100 nm; Scale bars (B) = 200 nm.

**Fig S4.** *ftsE* mutants incorporate new cell wall material throughout skinny connections between cell bodies.

HADA labeling of (A) WT, (B)  $\Delta ftsE$ , and (C)  $\Delta ftsE$  cells depleted for AmiC for 6 h. (D) FtsZ-CFP localization after 1 h of induction in  $\Delta ftsE$  cells. \* = HADA incorporation throughout skinny connections in  $\Delta ftsE$ ; # = absence of FtsZ at skinny connections in  $\Delta ftsE$ . Scale bars = 2  $\mu$ m.

**Fig S5.** Overproducing LdpF, the LytM domain (LytM) of LdpF or AmiC is not lytic *in vivo*.

Phase contrast images of cells overproducing LdpF, the LytM of LdpF or AmiC for 24 h. Scale bar = 2  $\mu$ m.

**Text S1.** Supporting results and discussion describing biochemical investigation of cell wall hydrolase activities of LytM proteins and AmiC.

**Table S1.** Strains and plasmids used in this study with their methods of construction.

A

EG864 WT

B

EG1133  $\Delta ftsE$ 

TEM

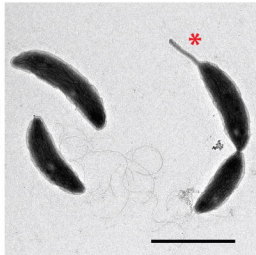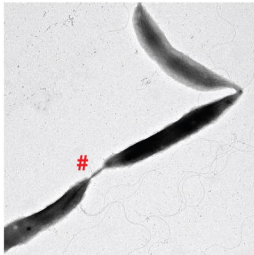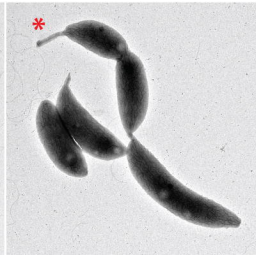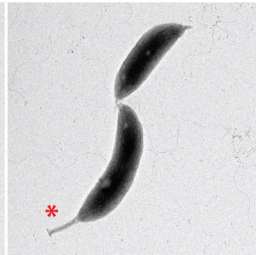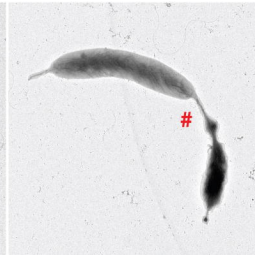



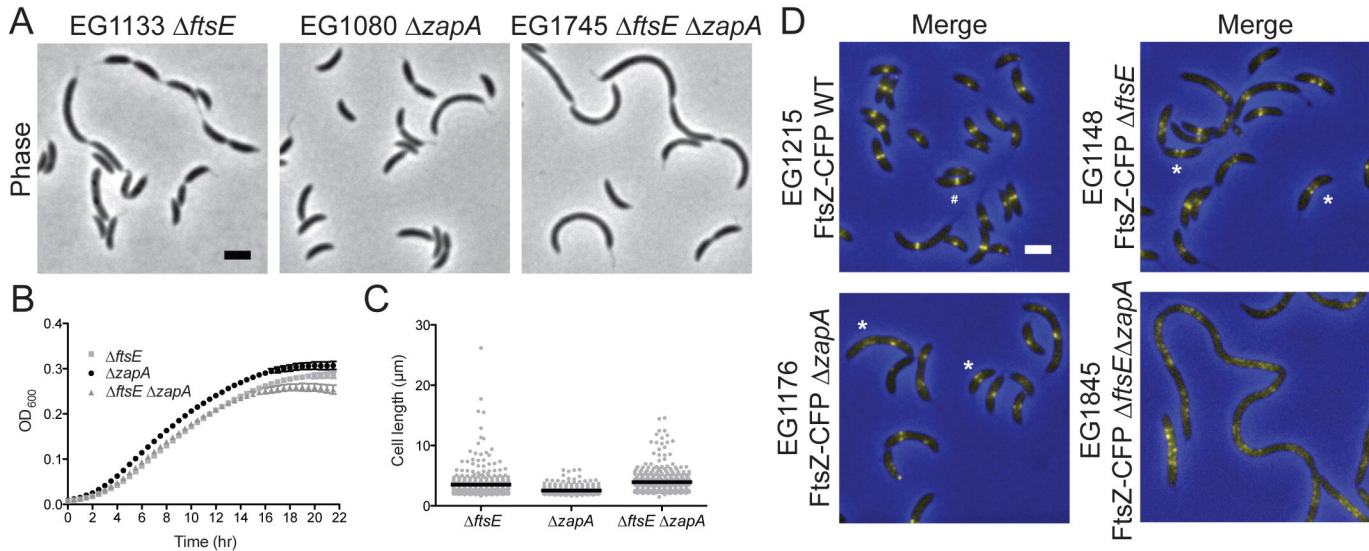

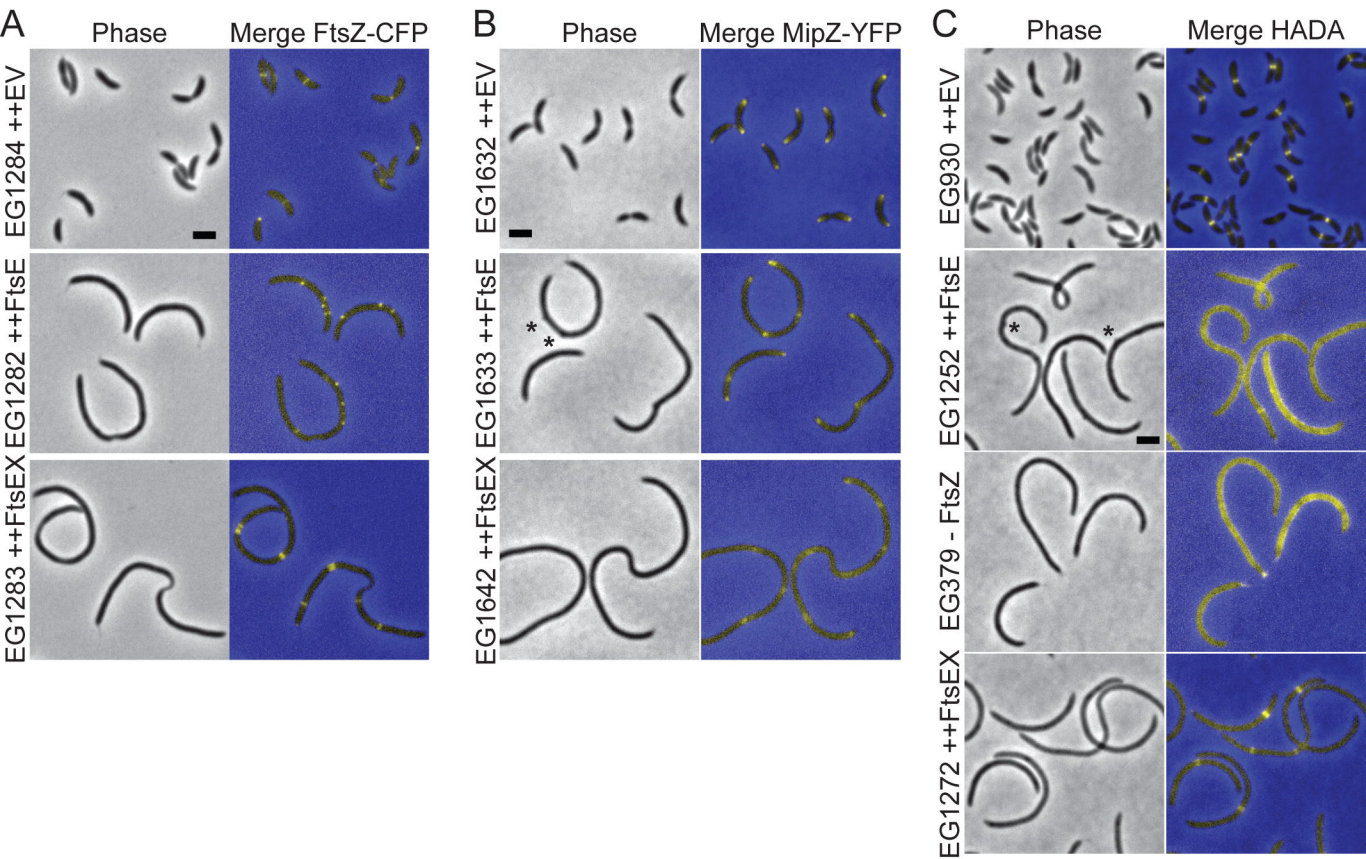

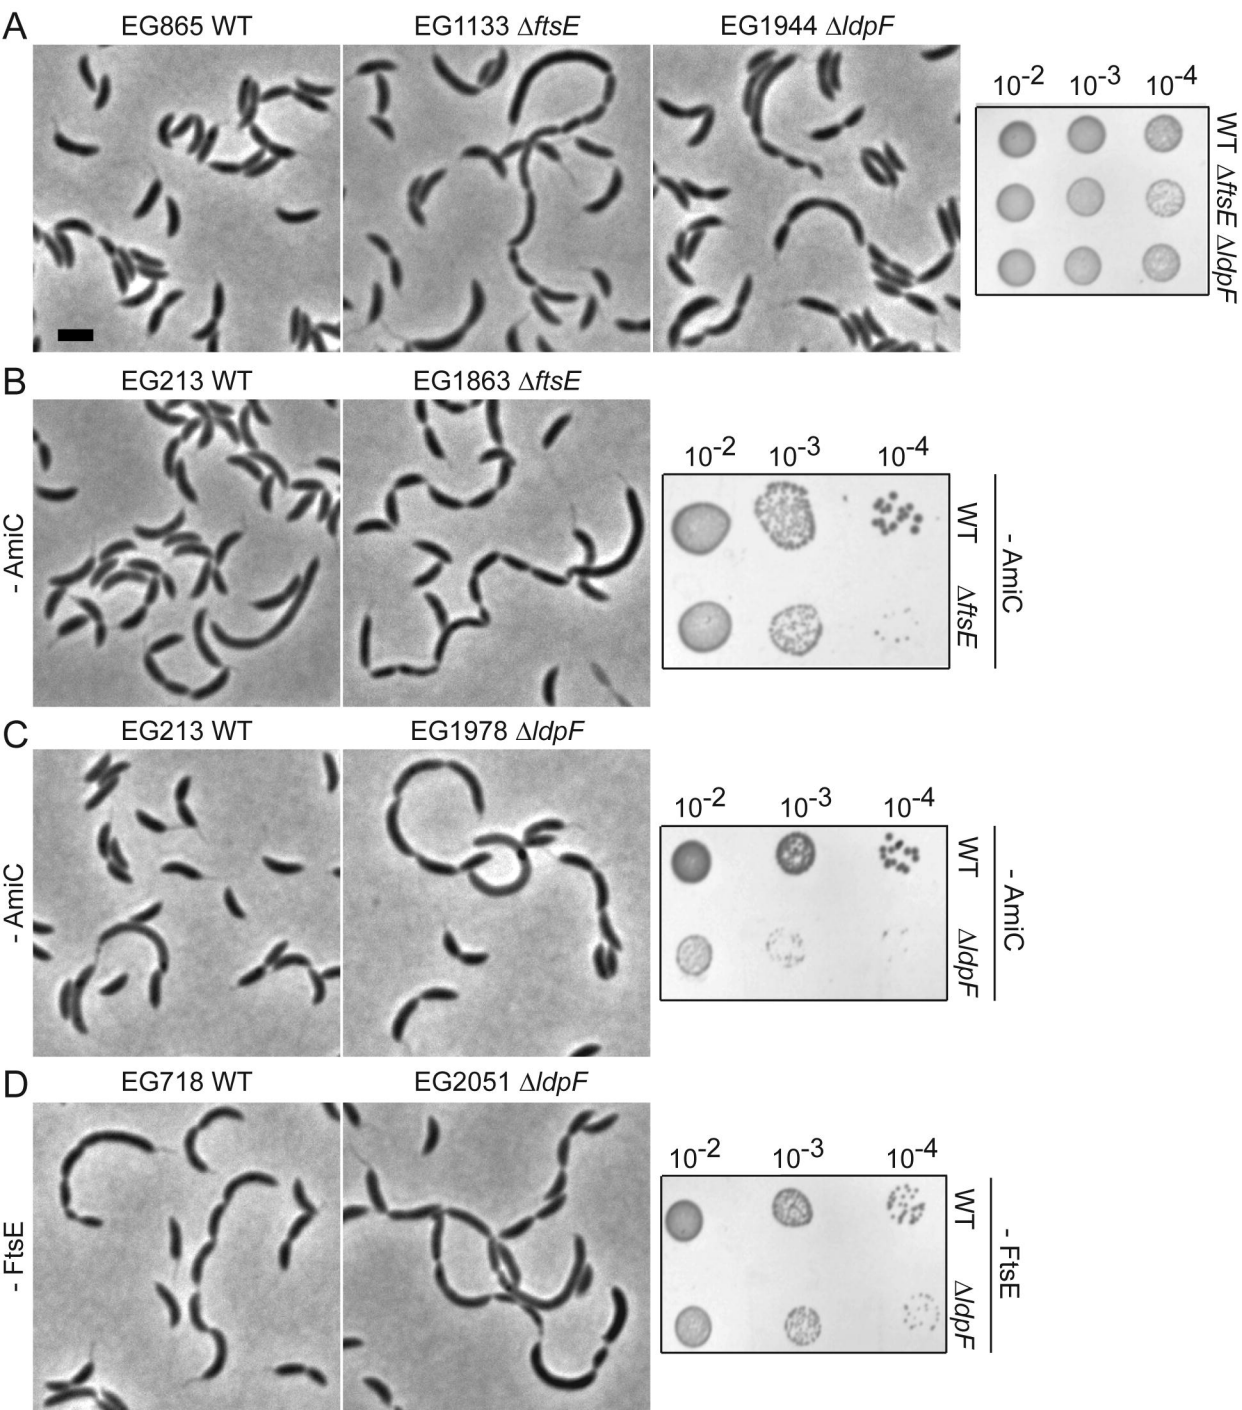

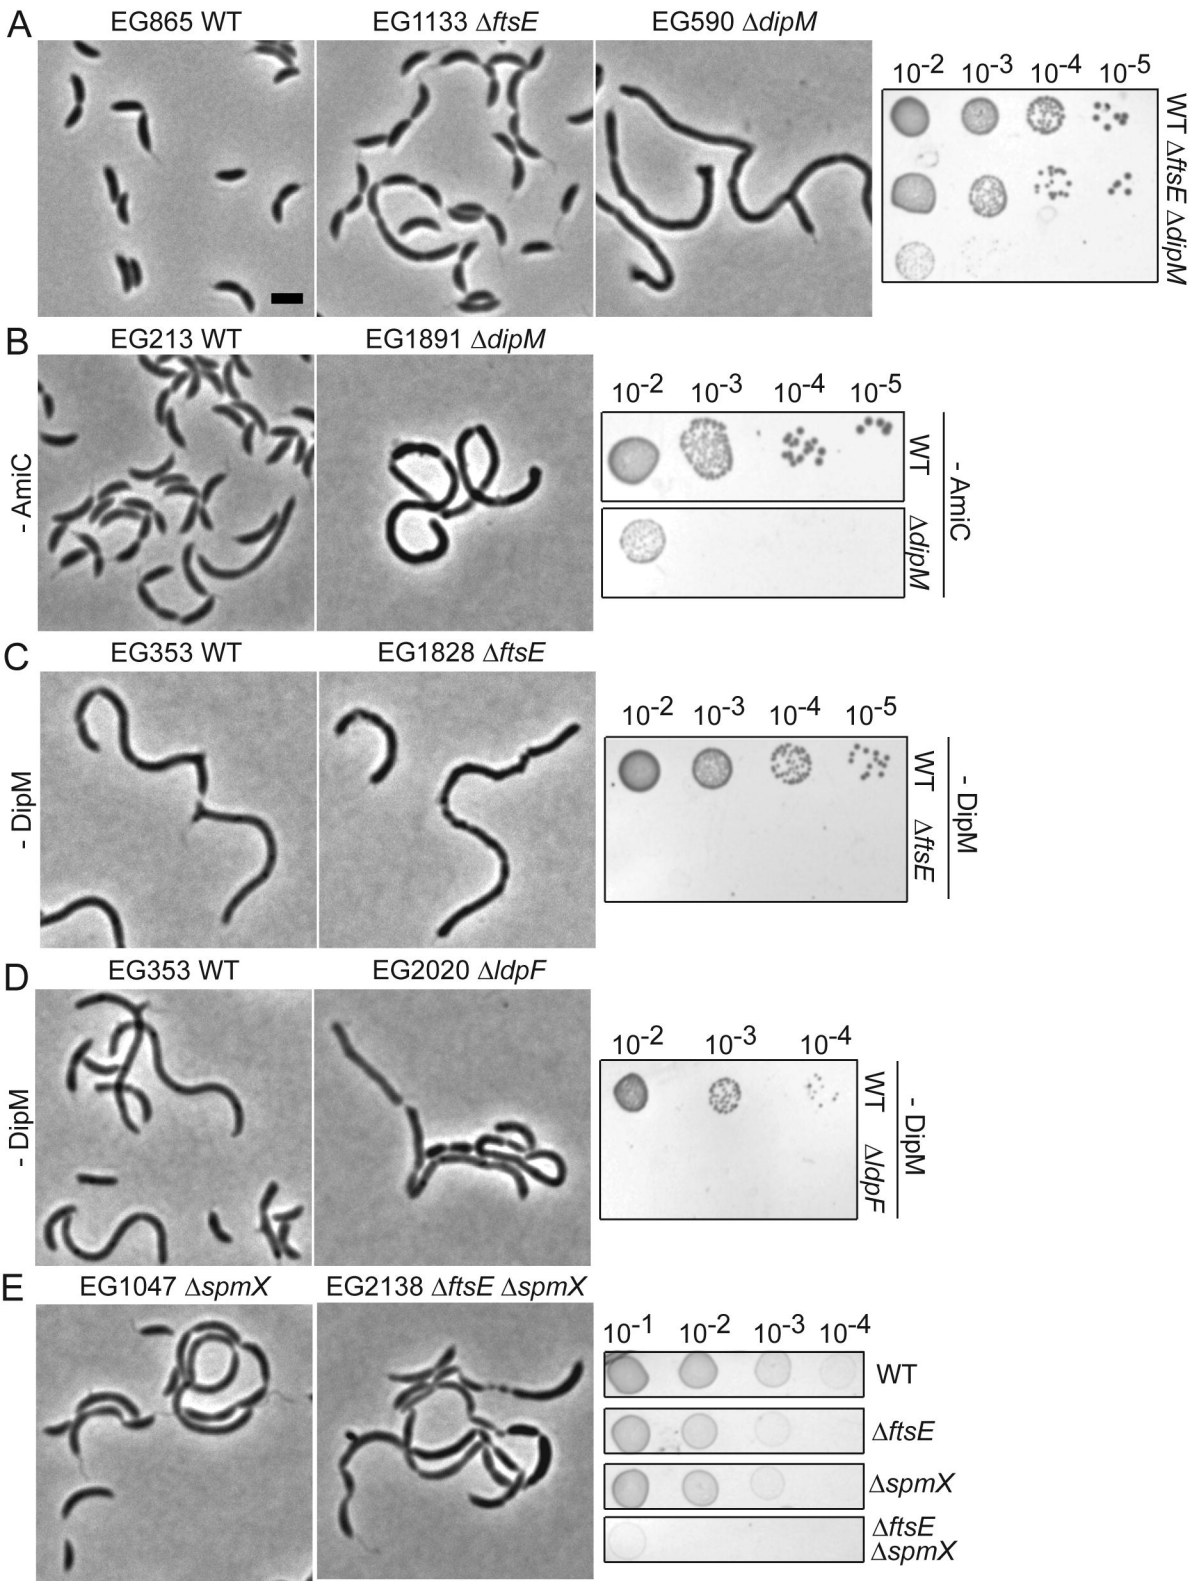



A

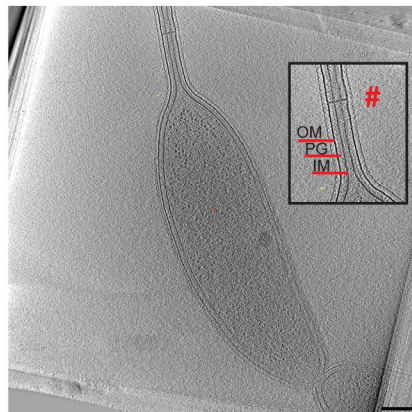

B

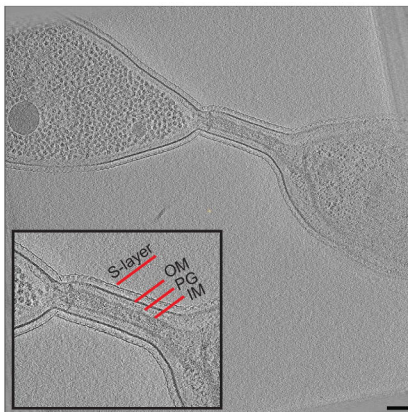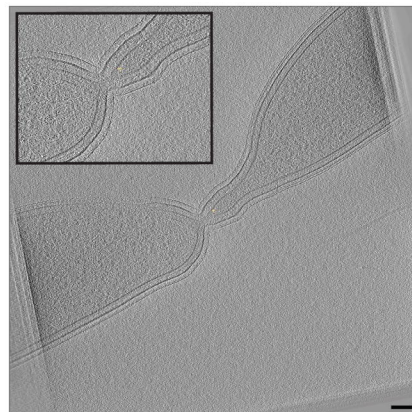

C

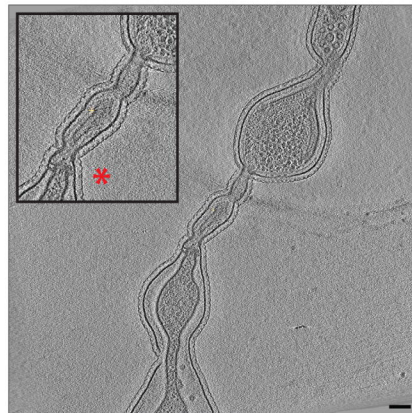

D

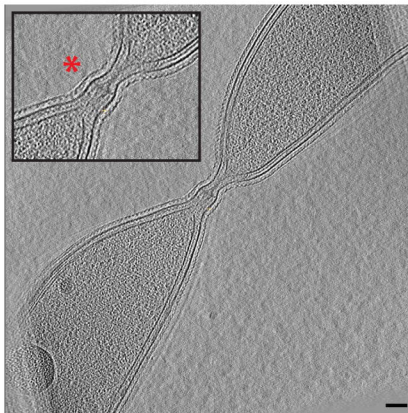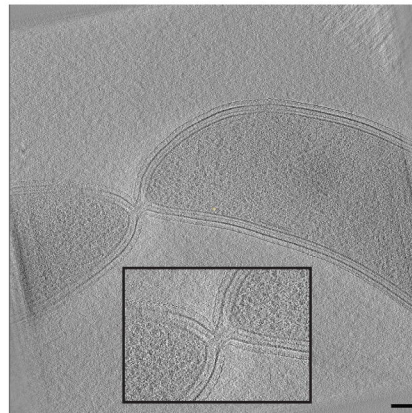

A

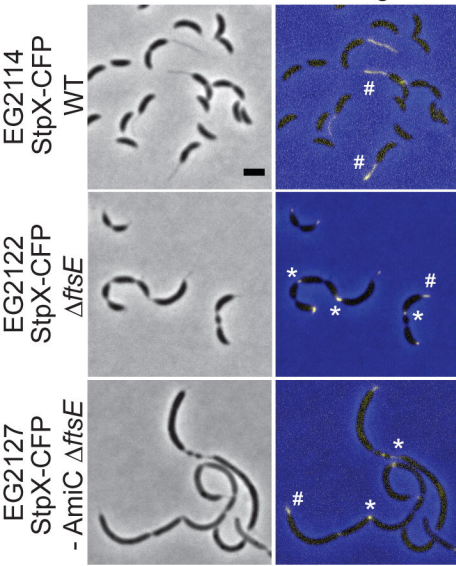

B

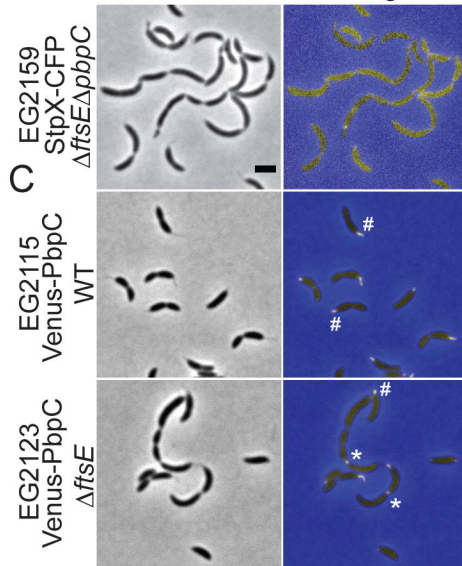

C

D

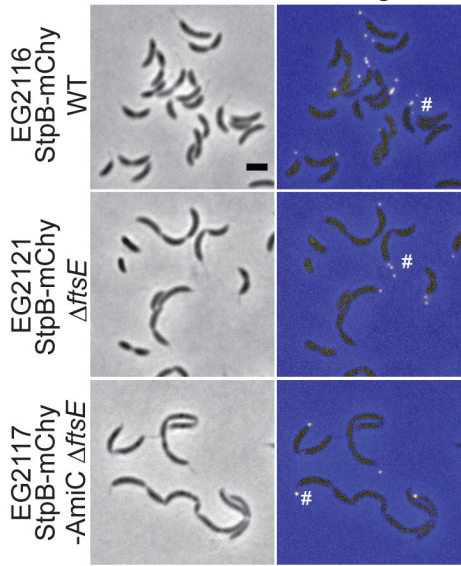

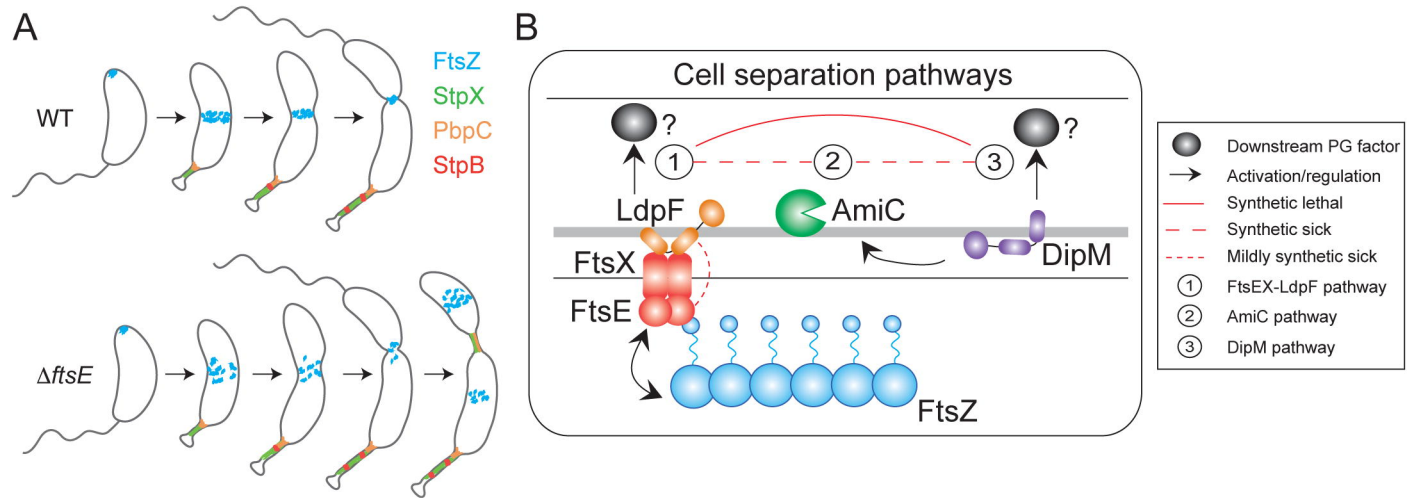

Source: http://biorxiv.org/content/10.1101/124214v1.full.pdf
